# Supplementary material for: Epidemiological and PK/PD cutoff values determination and PK/PD-based dose assessment of gamithromycin against Haemophilus parasuis in piglets
Source: PubMed Central journal article supplement (PMC7059257; doi:10.1186/s12917-020-02300-y), 2020-03-05
Supplement: 12917_2020_2300_MOESM1_ESM.pdf [file 12917_2020_2300_MOESM1_ESM.pdf]

## Supplementary Materials

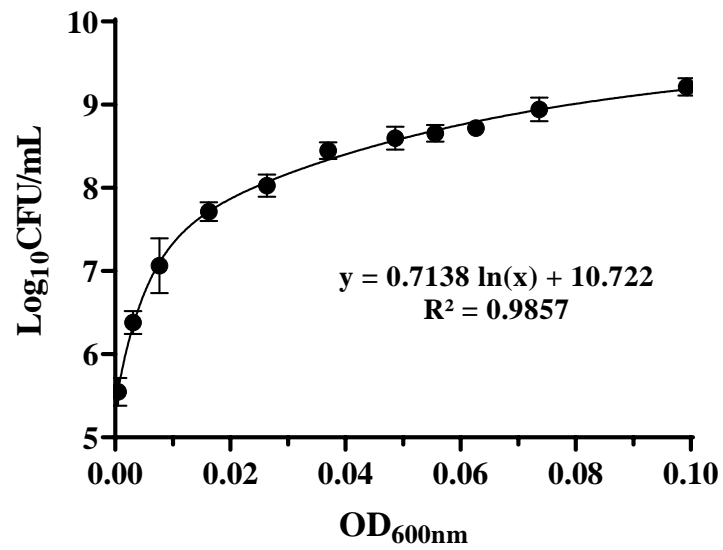

**Figure S1.** Standard curve constructed by regression of the viable bacterial counts and optical density (OD<sub>600nm</sub>) of *H. parasuis* cultured in liquid medium. The solid points represent the observed data and the line represents the best fitting curve as follows:  $y = 0.7138 \ln(x) + 10.722$  ( $R^2=0.9857$ ).
